# Supplementary material for: Surface segregation and stability of core–shell alloy catalysts for oxygen reduction in acid medium
Source: Royal Society of Chemistry journal article supplement (doi:10.1039/b917899f), 2010-01-01
Supplement: b917899f.pdf [file b917899f.pdf]

## Pt/Ni

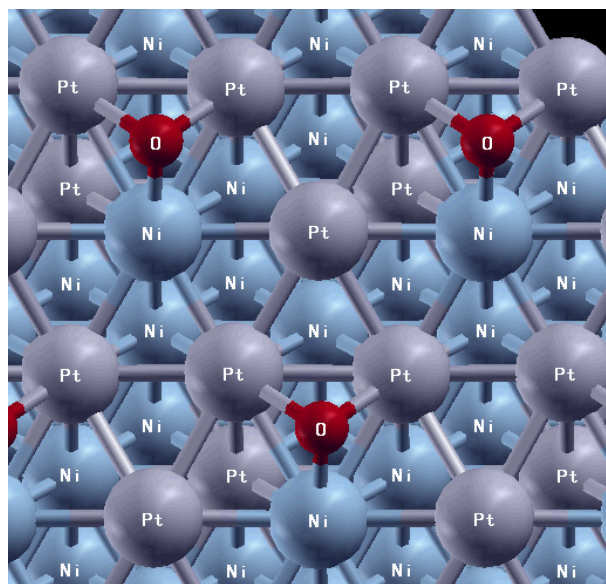

When Ni segregates, no  
surface reconstruction

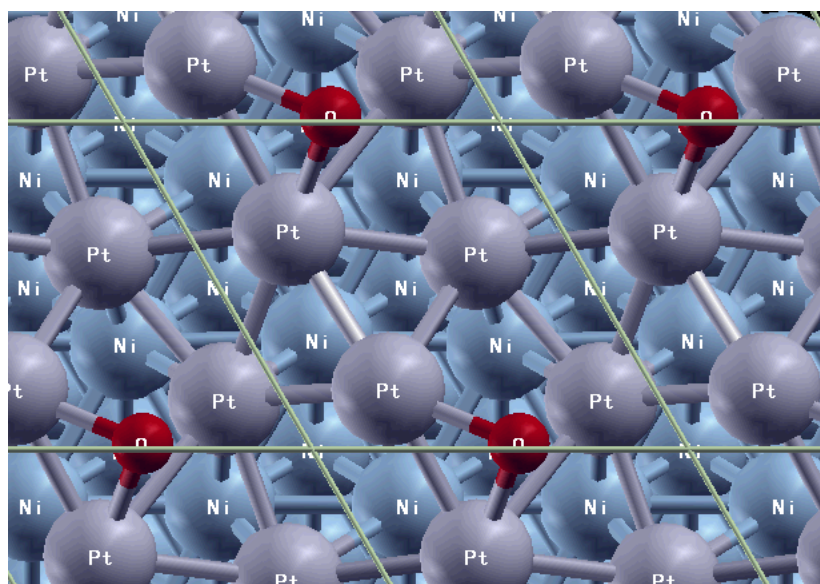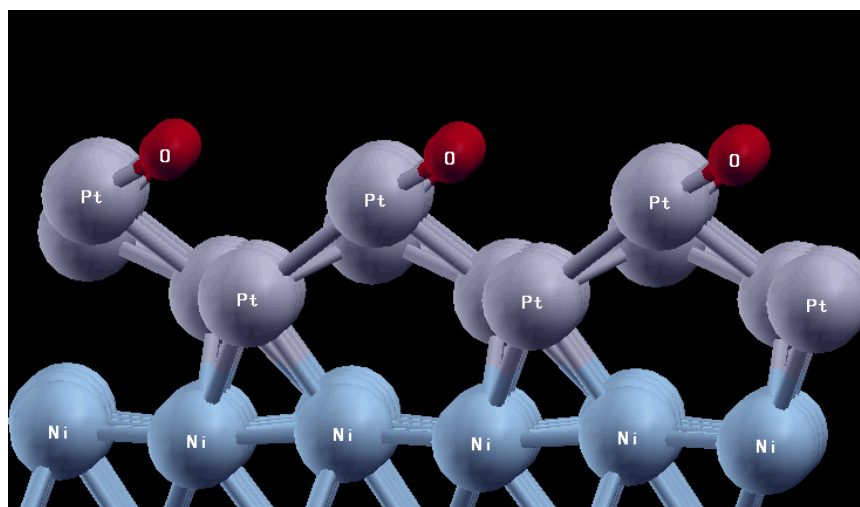

Pt-skin Surface reconstruction in a Pt/Ni structure

## Pt/Co

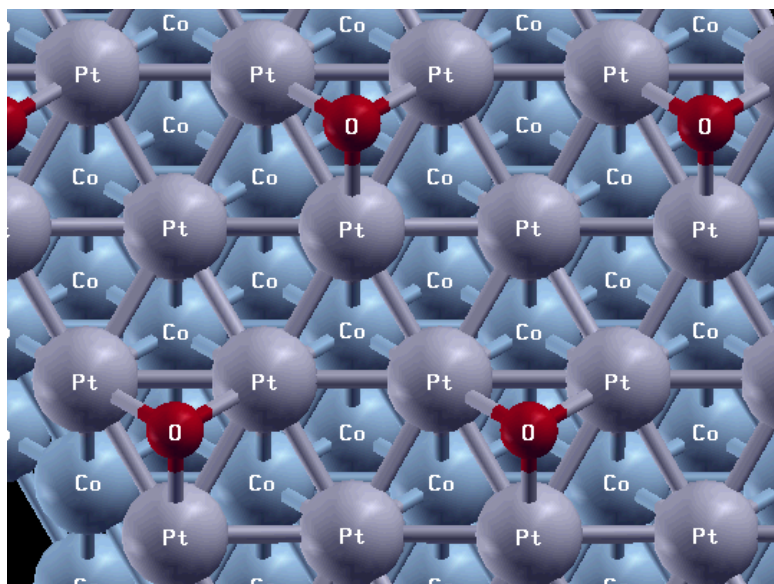

Pt-skin no surface reconstruction

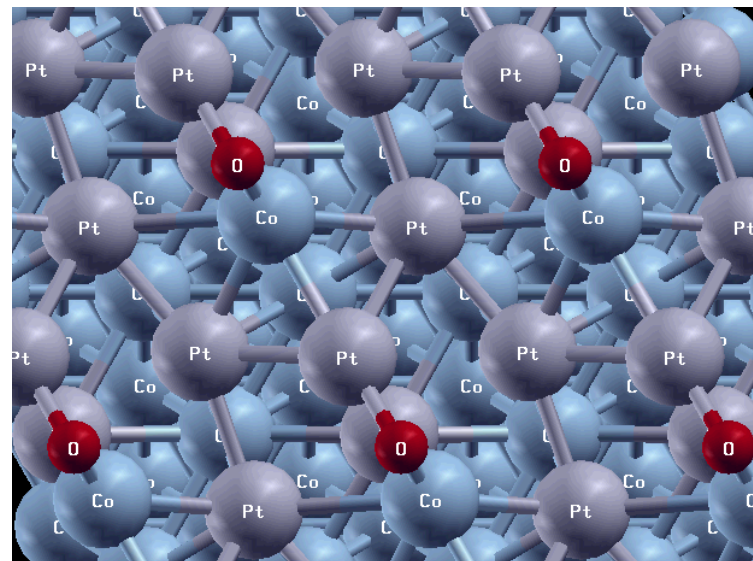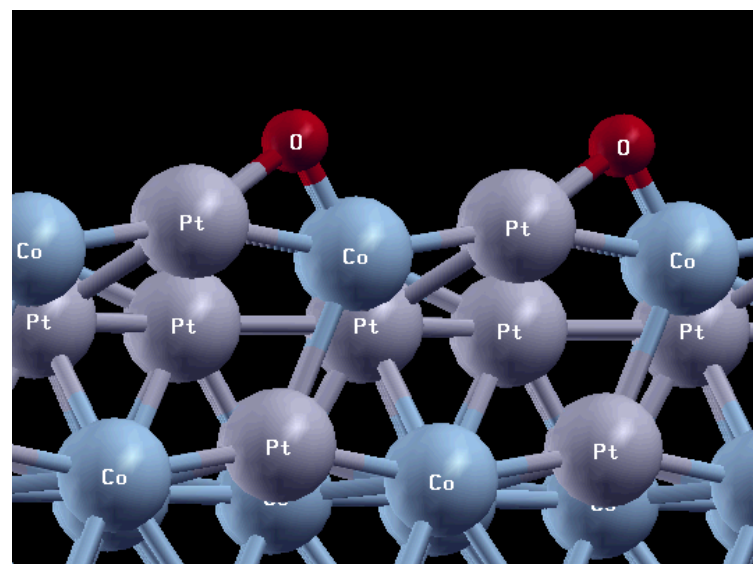

When Co segregates, surface  
reconstruction
